# Supplementary material for: Enhanced Leaf Cooling Is a Pathway to Heat Tolerance in Common Bean
Source: PubMed Central journal article supplement (PMC7059850; doi:10.3389/fpls.2020.00019), 2020-02-28
Supplement: DataSheet_1.pdf [file DataSheet_1.pdf]

## Supplementary Material

Table 1: Summary of Experiments

| Experiments | Treatments                           | No. observations in whole sample analysis | Days Sampled | Genotypes | Location       | Irrigation             | Season      |
|-------------|--------------------------------------|-------------------------------------------|--------------|-----------|----------------|------------------------|-------------|
| H1          | Ambient, GH control, GH night heat   | 3306                                      | 10           | 3         | Cali, Colombia | Irrigated              | Spring 2018 |
| H2          | Ambient, GH night heat               | 832                                       | 3            | 10        | Cali, Colombia | Irrigated              | Summer 2017 |
| H3          | Ambient, GH control, GH night heat   | 266                                       | 3            | 3         | Cali, Colombia | Irrigated              | Spring 2018 |
| D1          | Ambient, Early Drought, Late Drought | 1287                                      | 1            | 20        | Cali, Colombia | Full, Partial, Partial | Summer 2018 |
| S1          | Soil compaction from rice rotation   | 1066                                      | 2            | 6         | Cali, Colombia | Irrigated              | Spring 2018 |

| <b>Experiment</b> | <b>Test</b>        | <b>Treatment</b>      | <b>Test-statistic</b>      | <b>p-value</b> |
|-------------------|--------------------|-----------------------|----------------------------|----------------|
| H1                | Calima vs. SAB 686 | Ambient               | two-sided permutation test | 0.980          |
| H1                | Calima vs. SEF 60  | Ambient               | two-sided permutation test | 0.576          |
| H1                | Calima vs. SAB 686 | Greenhouse control    | two-sided permutation test | 0.608          |
| H1                | Calima vs. SEF 60  | Greenhouse control    | two-sided permutation test | 0.431          |
| H1                | Calima vs. SAB 686 | Greenhouse night heat | two-sided permutation test | 0.205          |
| H1                | Calima vs. SEF 60  | Greenhouse night heat | two-sided permutation test | 0.062          |
| H2                | Calima vs. SAB 686 | Ambient               | two-sided permutation test | 0.836          |
| H2                | Calima vs. SAB 686 | Greenhouse night heat | two-sided permutation test | 0.398          |

Table 2: Test statistics for a comparison of leaf angle group means between genotypes for each treatment of the H1 and H2 experiments.

| <b>Experiment</b> | <b>Test</b>        | <b>Treatment</b>      | <b>Test-statistic</b>      | <b>p-value</b> |
|-------------------|--------------------|-----------------------|----------------------------|----------------|
| H1                | Calima vs. SAB 686 | Ambient               | two-sided permutation test | 0.012          |
| H1                | Calima vs. SEF 60  | Ambient               | two-sided permutation test | 0.045          |
| H1                | Calima vs. SAB 686 | Greenhouse control    | two-sided permutation test | 0.113          |
| H1                | Calima vs. SEF 60  | Greenhouse control    | two-sided permutation test | 0.053          |
| H1                | Calima vs. SAB 686 | Greenhouse night heat | two-sided permutation test | 0.081          |
| H1                | Calima vs. SEF 60  | Greenhouse night heat | two-sided permutation test | 0.900          |
| H2                | Calima vs. SAB 686 | Ambient               | two-sided permutation test | 0.886          |
| H2                | Calima vs. SAB 686 | Greenhouse night heat | two-sided permutation test | 0.358          |

Table 3: Test statistics for a comparison of leaf thickness group means between genotypes for each treatment of the H1 and H2 experiments.

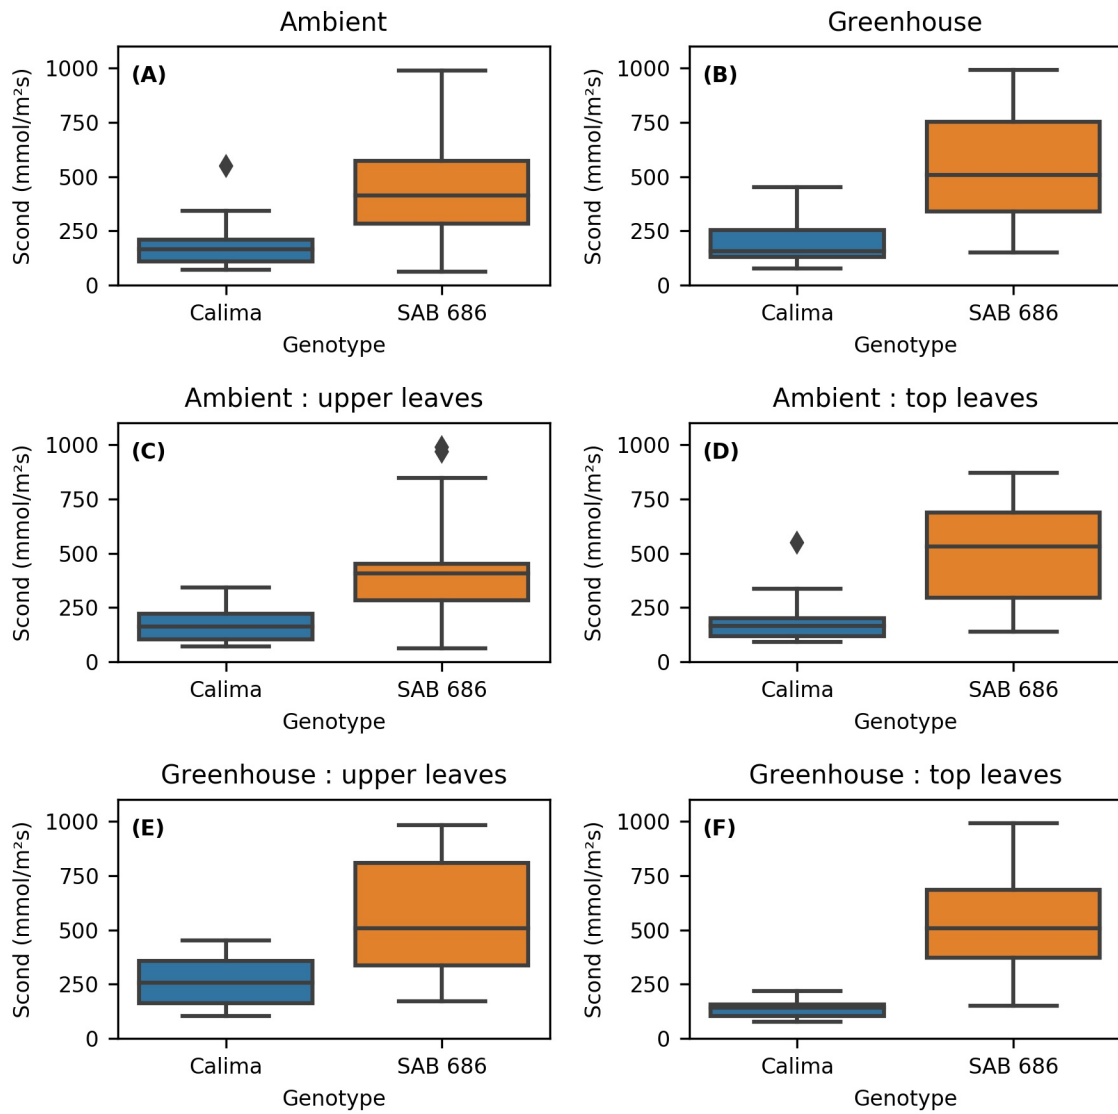

Figure 1: The distribution of stomatal conductance for Calima and SAB686 for experiment H2 (A) Ambient treatment (B) Greenhouse night heat treatment (C) Ambient treatment-upper leaves (D) Ambient treatment-top leaves (E) Greenhouse night heat treatment-upper leaves (F) Greenhouse night heat treatment-top leaves

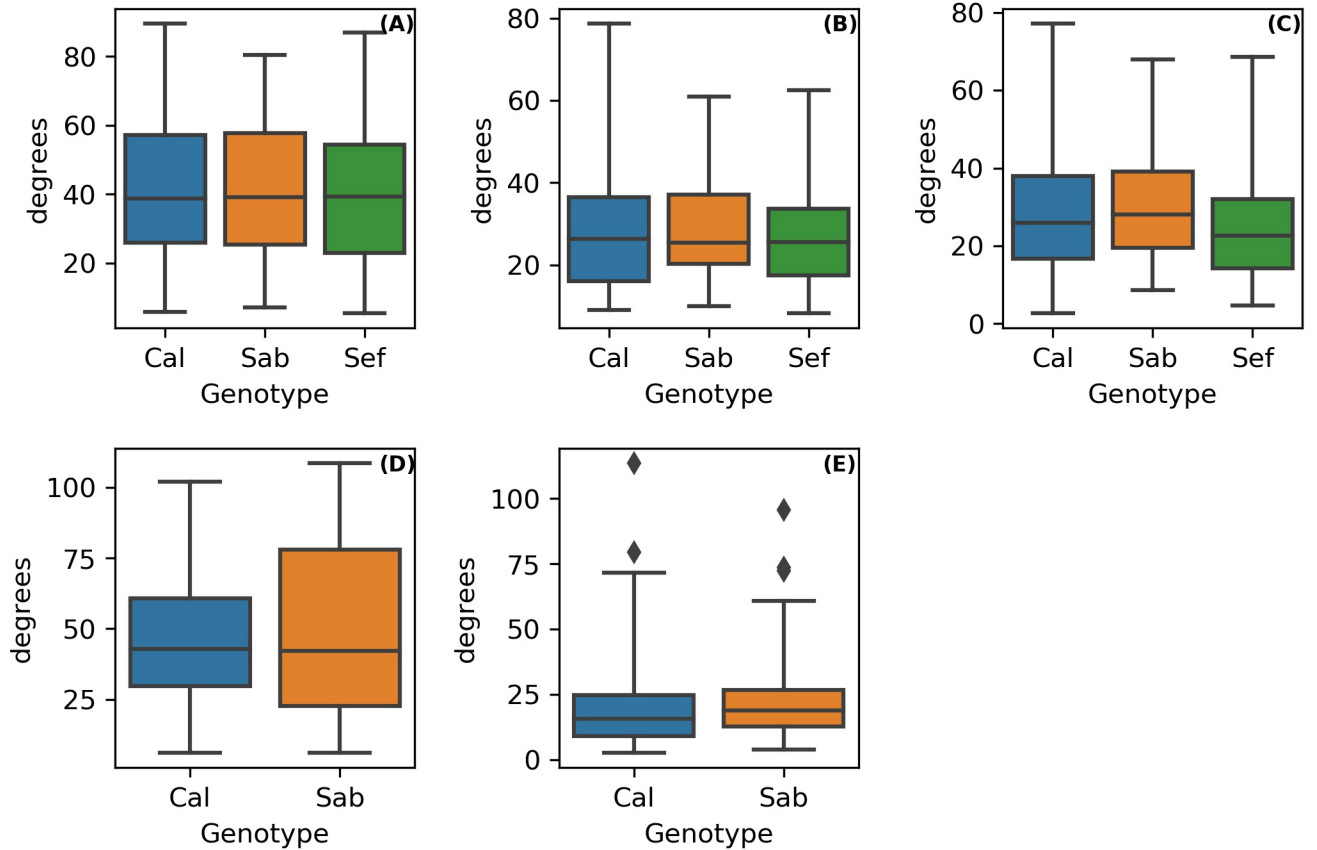

Figure 2: The distribution of leaf angle by genotype in experiments H1 and H2 (A) H1-ambient treatment (B) H1-greenhouse control treatment (C) H1-greenhouse night heat treatment (D) H2-ambient treatment (E) H2-greenhouse night heat treatment

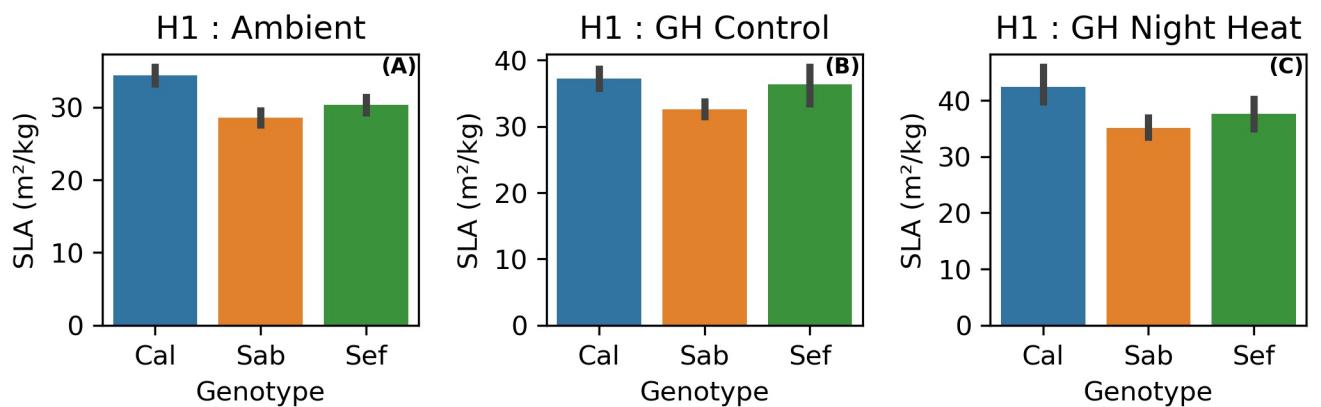

Figure 3: Mean Specific Leaf Area by genotype in experiment H1 (A) Ambient treatment (B) Greenhouse control treatment (C) Greenhouse night heat treatment. Error bars represent the 95th confidence interval

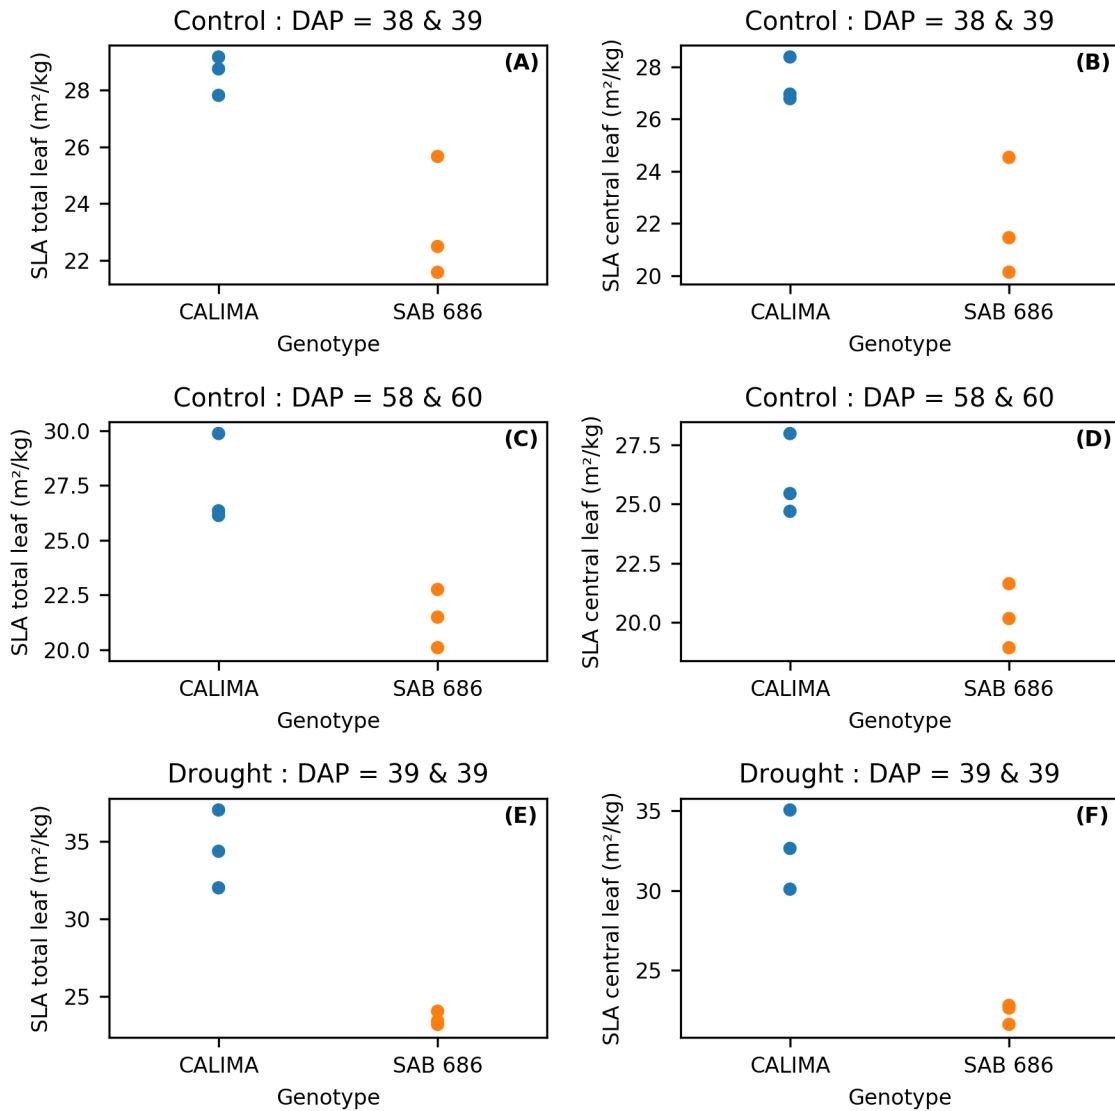

Figure 4: Specific Leaf Area by genotype in experiment D2 for the whole trifoliolate leaf and the central trifoliolate leaf (A), (C) and (E) gives the SLA of the whole trifoliolate leaf during snapshots of the control and drought treatments. (B), (D) and (F) gives the SLA of the central trifoliolate leaf during snapshots of the control and drought treatments. DAP is short for days after planting. Each dot represents the average of 5 replications

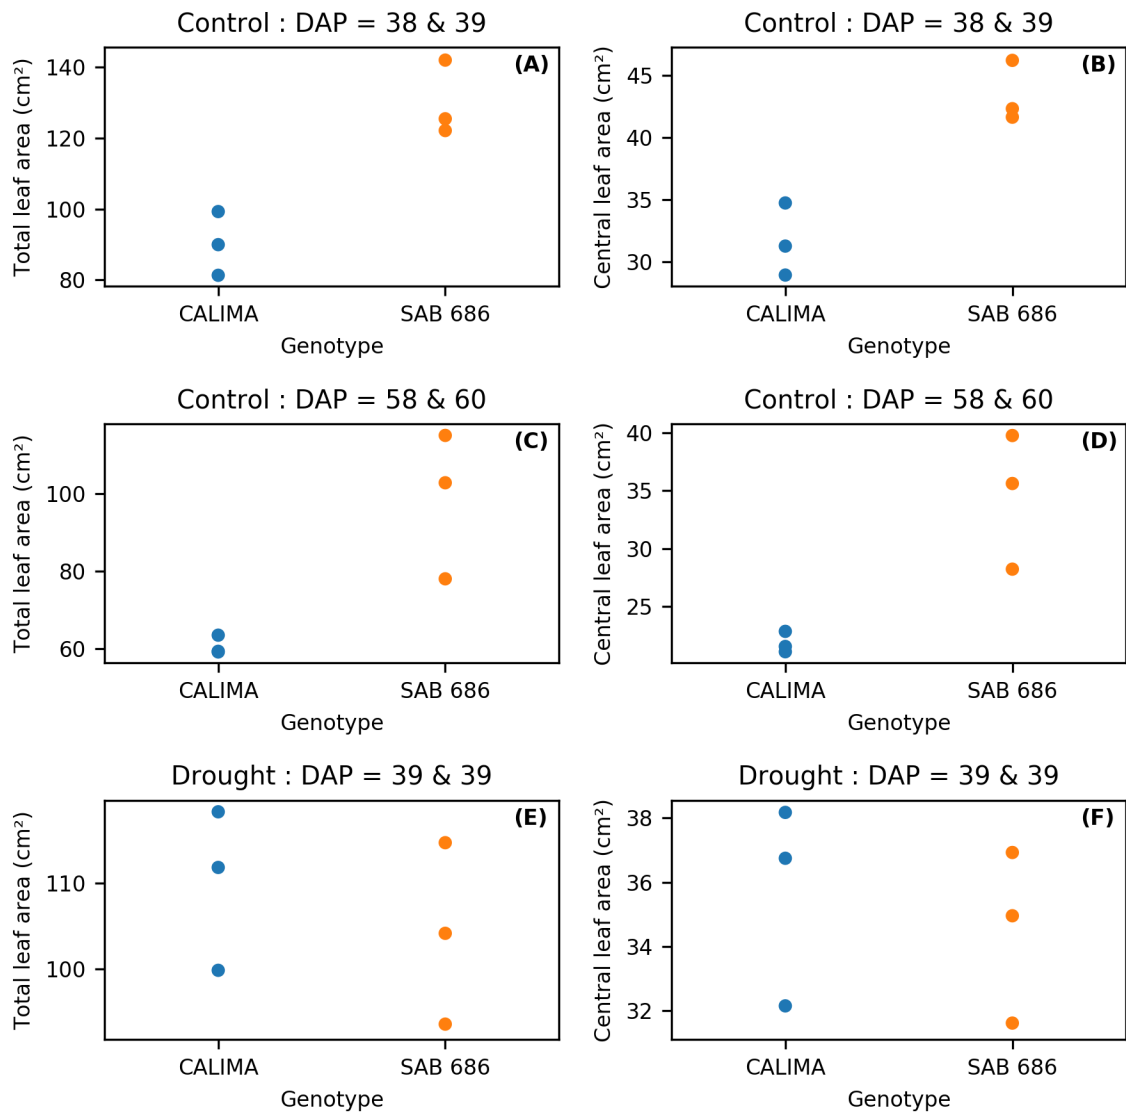

Figure 5: Leaf Area by genotype in experiment D2 for the whole trifoliate leaf and the central trifoliate leaf (A), (C) and (E) gives the LA of the whole trifoliate leaf during snapshots of the control and drought treatments. (B), (D) and (F) gives the LA of the central trifoliate leaf during snapshots of the control and drought treatments. DAP is short for days after planting. Each dot represents the average of 5 replications

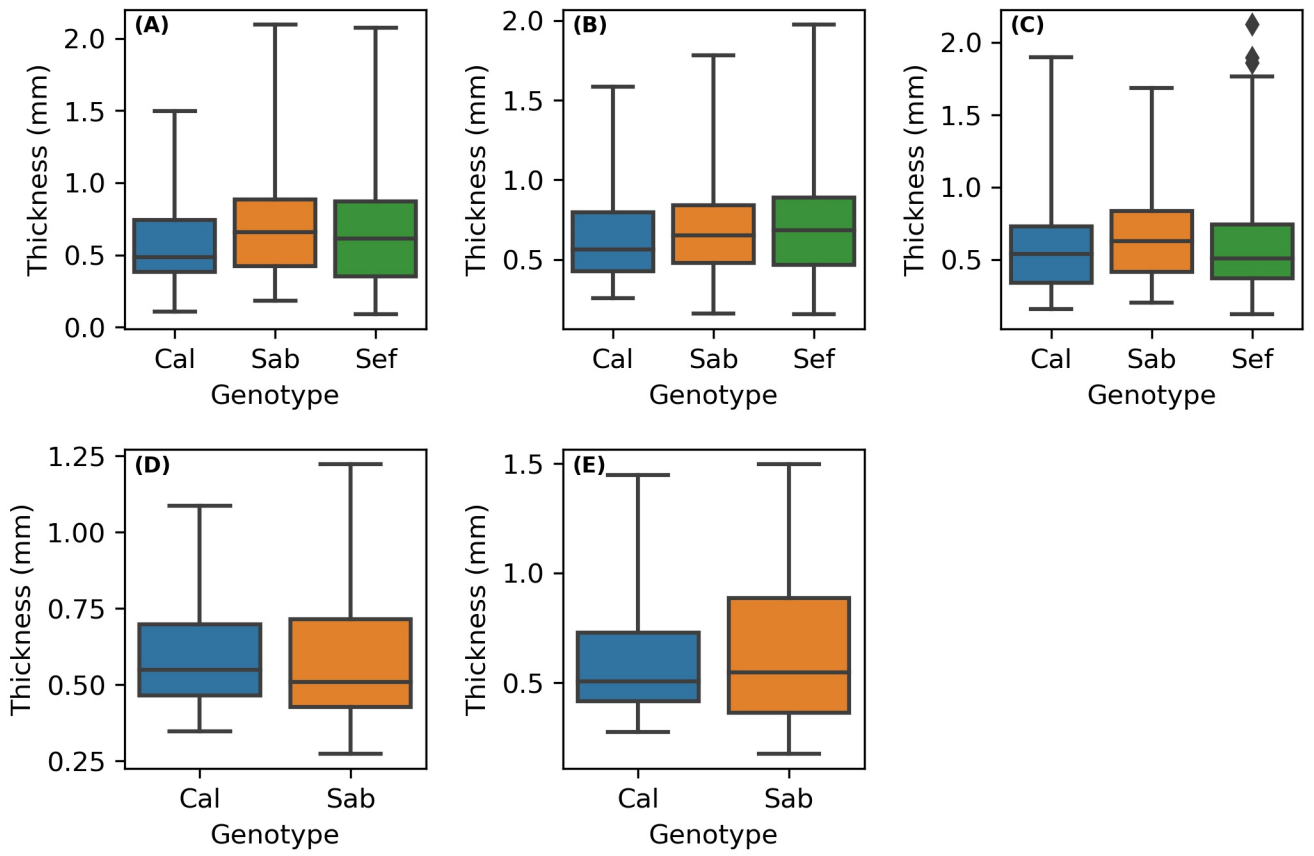

Figure 6: Distribution of leaf thickness by genotype in experiments H1 and H2 (A) H1-ambient treatment (B) H1-greenhouse control treatment (C) H1-greenhouse night heat treatment (D) H2-ambient treatment (E) H2-greenhouse night heat treatment
